# Supplementary material for: Cohort profile: the St Vincent’s Melbourne Arthroplasty Outcomes (SMART) Registry, a pragmatic prospective database defining outcomes in total hip and knee replacement patients
Source: HighWire-hosted journal article supplement (doi:10.1136/bmjopen-2020-040408), 2021-01-01
Supplement: bmjopen-2020-040408supp007_data_supplement.pdf [file bmjopen-2020-040408supp007_data_supplement.pdf]

| PBS variables                 |                                                                                                       | MBS variables               |                                                                                       |
|-------------------------------|-------------------------------------------------------------------------------------------------------|-----------------------------|---------------------------------------------------------------------------------------|
| Variable name                 | Description                                                                                           | Variable name               | Description                                                                           |
| AIHW PPN                      | A unique encrypted number for each subject                                                            | AIHW PPN                    | A unique encrypted number for each subject                                            |
| Patient sex                   | Sex of subject                                                                                        | Enrolment postcode          | The postcode of each subject                                                          |
| Patient date of birth         | Date of birth of subject                                                                              | Sex                         | Sex of subject                                                                        |
| Patient category derived disc | Category of patient's eligibility status at the time of supply i.e., general, concession, safety net) | Date of birth               | Date of birth of subject                                                              |
| Patient contribution amount   | The amount paid by the patient                                                                        | Servicing provider ID       | A unique encrypted number for each service provider                                   |
| Benefit amount                | The amount paid by the government                                                                     | Servicing provider location | Location of servicing provider                                                        |
| Pharmacy postcode             | Postcode of the pharmacy at which the prescription medicinal product is dispensed                     | Servicing provider postcode | Postcode of the servicing provider                                                    |
| Pharmacy ID                   | A unique encrypted number for each pharmacy                                                           | Service provider specialty  | The broad speciality of the health professional that provided the service             |
| Patient postcode              | Postcode of the subject                                                                               | Referring provider number   | A unique encrypted number for each service provider who requested further care        |
| Drug type                     | The type of chemical substance prescribed                                                             | Referring provider practice | A unique encrypted number of the practice service provider who requested further care |
| Item code                     | Item number reflected in the PBS                                                                      | Referring provider postcode | Postcode of the servicing provider who requested further care                         |
| Prescriber specialty          | Subspecialty field of speciality of the prescriber of the PBS                                         | Referring date              | The date that the MBS service was requested                                           |

|                               |                                                                                                                  |                                          |                                                                            |
|-------------------------------|------------------------------------------------------------------------------------------------------------------|------------------------------------------|----------------------------------------------------------------------------|
|                               | item                                                                                                             |                                          |                                                                            |
| Quantity supplied reg24 adj   | The total amount of the medicinal product dispensed by a pharmacist                                              | Date of service                          | Date the MBS service was rendered                                          |
| Number of scripts dispensed   | The number of times a medicinal product is supplied to the patient or PBS consumer                               | Date of processing                       | Date the MBS item was processed                                            |
| Previous supply number        | The number of times the product has been supplied to the patient or PBS consumer                                 | Item number original                     | The original item number of the MBS item claimed                           |
| Pharmacy approval type        | Type of approval of the pharmacy at which the prescription medicinal product is dispensed, represented by a code | Item number current                      | The current item number of the MBS item claimed                            |
| Date of prescribing           | Date that the prescription was supplied by a Medical Practitioner to a patient                                   | Hospital flag                            | Whether a MBS service was provided in or outside of hospital               |
| Prescriber ID                 | A unique encrypted number identifying the particular prescriber of the PBS item                                  | Bulk billing flag                        | The type of billing for the MBS service                                    |
| Prescriber postcode           | Postcode of the prescriber                                                                                       | Benefit paid                             | The amount of benefit paid to the patient                                  |
| Prescriber type code          | Broad field of speciality of the prescriber for the PBS item                                                     | Fee charged                              | The total amount a patient is charged by the Medicare service provider     |
| Regulation 24 indicator       | To indicate whether the regulation 24 code was used in the supply                                                | Schedule fee                             | How much Medicare believe the Medicare service is worth                    |
| Repeat order number           | The number of repeat supplies to the patient or PBS consumer                                                     | Number of services provided              | The total number of MBS services provided by the Medicare service provider |
| Repeat prescription indicator | Original or original repeat prescription                                                                         | Number of Services Processed - including | The total number of MBS services processed by the                          |

|                                     |                                                                                                                                                                                                                                      |                                         |                                                                                                                                                                                                                   |
|-------------------------------------|--------------------------------------------------------------------------------------------------------------------------------------------------------------------------------------------------------------------------------------|-----------------------------------------|-------------------------------------------------------------------------------------------------------------------------------------------------------------------------------------------------------------------|
|                                     |                                                                                                                                                                                                                                      | bulk billing and modifier items         | Medicare service provider                                                                                                                                                                                         |
| Date of supply                      | Date the prescription was supplied by the pharmacy                                                                                                                                                                                   | MBS item map                            | Contains further information around the MBS item (the MBS has a hierarchic structure covering attendances, test and procedures and each item is allocated into a category and a group, and also often a subgroup) |
| Under copayment prescription        | The benefit type a patient is eligible to                                                                                                                                                                                            | MBS category code (in MBS item map)     | Broadest level of detail around hierarchic structure                                                                                                                                                              |
| Streamlined authority approval      | The PBS authority code                                                                                                                                                                                                               | MBS group code (in MBS item map)        | Detailing around hierarchic structure                                                                                                                                                                             |
| Form type code disc                 | A code for the type of forms available when making a claim for benefits available under the PBS variables included in the PBS/RPBS (RPBS = Repatriation PBS) item map (contains further information around the PBS item – see below) | MBS subgroup code (in MBS item map)     | Finest level of detail around hierarchic structure                                                                                                                                                                |
| PBS drugs item map                  | Includes further information about the PBS item i.e., form and strength                                                                                                                                                              | Broad type of service (in MBS item map) | Comprises a set of related MBS groups around hierarchic structure                                                                                                                                                 |
| Drug name (in PBS item map)         | The name of the chemical substance prescribed as specified in the Schedule of Pharmaceutical Benefits                                                                                                                                |                                         |                                                                                                                                                                                                                   |
| Form and strength (in PBS item map) | The form and strength of the drug                                                                                                                                                                                                    |                                         |                                                                                                                                                                                                                   |
| ATC5 code (in PBS item map)         | The code allocated by the World Health Organisation                                                                                                                                                                                  |                                         |                                                                                                                                                                                                                   |

|  |                                                            |  |  |
|--|------------------------------------------------------------|--|--|
|  | Collaborating Centre for<br>Drug statistics<br>Methodology |  |  |
|--|------------------------------------------------------------|--|--|
